# Supplementary material for: Immersion ice nucleation of atmospherically relevant lipid particles
Source: Royal Society of Chemistry journal article supplement (doi:10.1039/d4ea00066h), 2024-01-01
Supplement: d4ea00066h1.pdf [file d4ea00066h1.pdf]

**Electronic Supporting Information**

**Immersion Ice Nucleation of Atmospherically Relevant Lipid Particles**

Lincoln Mehndiratta<sup>1</sup>, Audrey E. Lyp<sup>1</sup>, Jonathan H. Slade<sup>1\*</sup>, Vicki H. Grassian<sup>1\*</sup>

<sup>1</sup>Department of Chemistry & Biochemistry, University of California San Diego, 9500 Gilman Dr,  
CA. 92037

Correspondence should be addressed to Vicki H. Grassian ([vhgrassian@ucsd.edu](mailto:vhgrassian@ucsd.edu)) and Jonathan  
H. Slade ([jhslade@ucsd.edu](mailto:jhslade@ucsd.edu))

The Electronic Supporting Information (ESI) contains 4 figures and 2 tables.

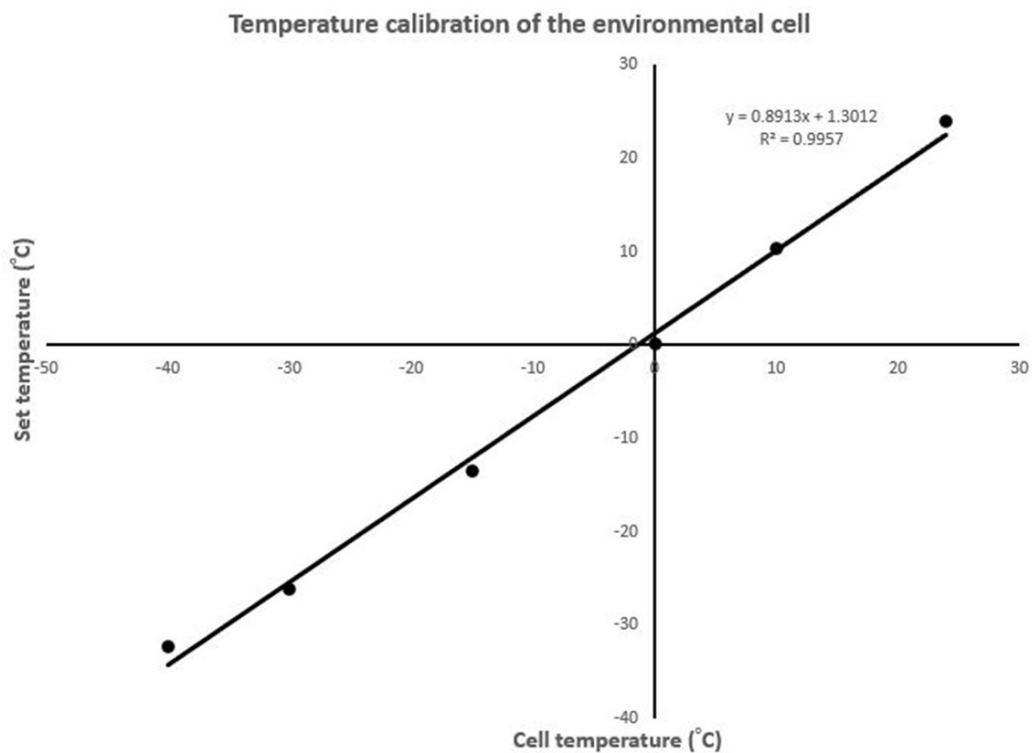

**Figure S1.** Calibration of the environmental cell and the linear relationship between the set temperature and the experimentally determined sample temperature.

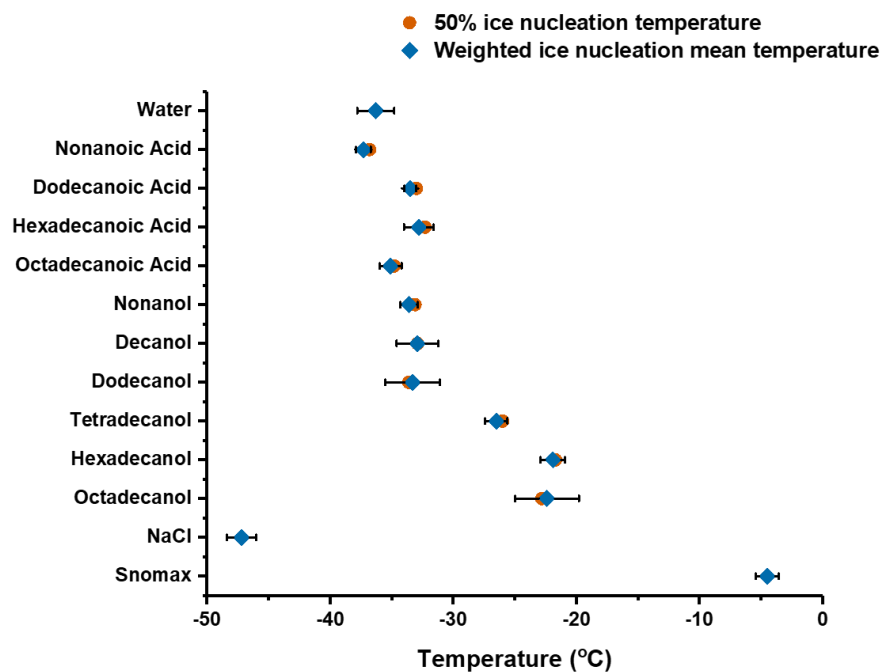

**Figure S2.** The weighted ice nucleation mean temperatures for fatty alcohols and fatty acids (blue diamonds) compared to 50% ice nucleation temperatures (orange circles). The error bars represent one standard deviation from the mean.

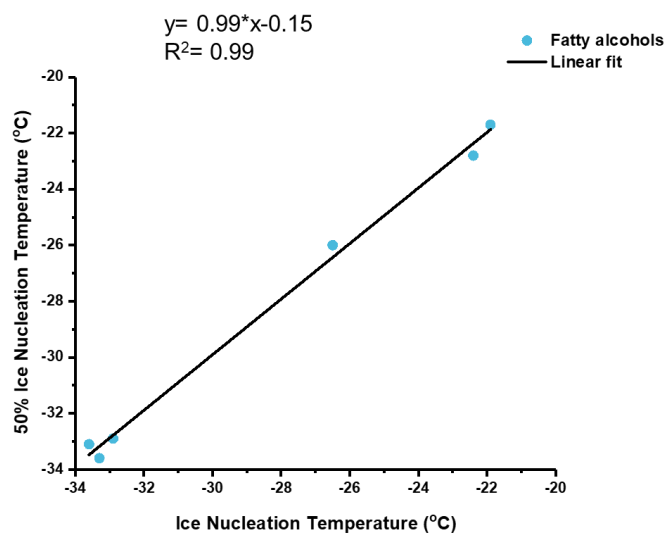

**Figure S3.** Linear regression of weighted ice nucleation mean temperatures and 50% ice nucleation temperatures for fatty alcohols.

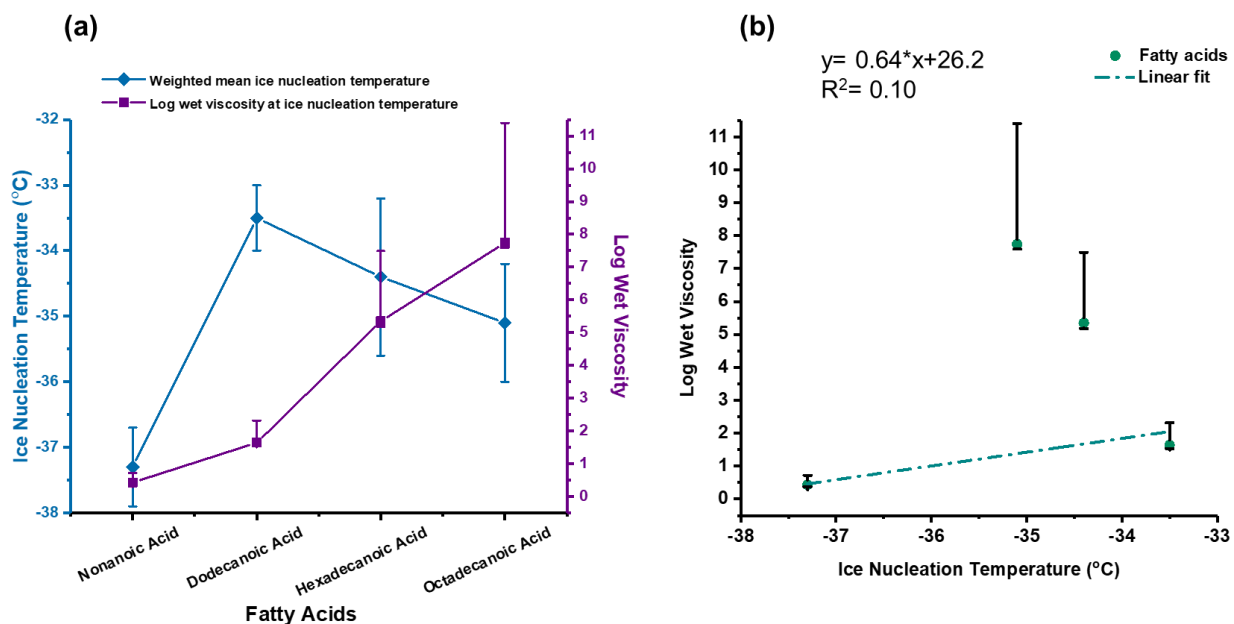

**Figure S4.** (a) illustrates ice nucleation temperatures, depicted by blue diamonds, alongside the estimated logarithm of wet viscosities at corresponding ice nucleation temperatures, represented by purple squares, and (b) a plot of the logarithm of wet viscosity against ice nucleation temperatures is presented for four fatty acids, fitted with a linear regression line. The uncertainties in the estimated log wet viscosities reflect the uncertainty in the fitting parameters in eq 1 to calculate the glass transition temperature.<sup>1</sup>

**Table S1.** Physical properties at 25 °C and melting points of fatty alcohols and fatty acids.

| <b>Fatty Species</b>           | <b>Physical State at 25 °C</b> | <b>Melting Point (°C)</b> |
|--------------------------------|--------------------------------|---------------------------|
| <b>Nonanol (C9)</b>            | Liquid                         | -5 to -6                  |
| <b>Decanol (C10)</b>           | Liquid                         | 6                         |
| <b>Dodecanol (C12)</b>         | Glassy Solid                   | 22 to 27                  |
| <b>Tetradecanol (C14)</b>      | Solid                          | 37 to 40                  |
| <b>Hexadecanol (C16)</b>       | Solid                          | 47 to 51                  |
| <b>Octadecanol (C18)</b>       | Solid                          | 55 to 58                  |
| <b>Nonanoic Acid (C9)</b>      | Liquid                         | 10 to 12                  |
| <b>Dodecanoic Acid (C10)</b>   | Solid                          | 43 to 45                  |
| <b>Hexadecanoic Acid (C16)</b> | Solid                          | 60 to 65                  |
| <b>Octadecanoic Acid (C18)</b> | Solid                          | 69 to 70                  |

**Table S2.** Tabulated values displaying the ice nucleation temperature weighted mean average values and their standard deviation (SD) values for fatty alcohols and fatty acids.

| <b>Fatty Species</b>           | <b>Ice Nucleation Weighted Mean Average (°C)</b> | <b>Standard Deviation (°C)</b> |
|--------------------------------|--------------------------------------------------|--------------------------------|
| <b>Nonanol (C9)</b>            | -33.6                                            | 0.7                            |
| <b>Decanol (C10)</b>           | -32.9                                            | 1.7                            |
| <b>Dodecanol (C12)</b>         | -33.3                                            | 2.2                            |
| <b>Tetradecanol (C14)</b>      | -26.5                                            | 0.9                            |
| <b>Hexadecanol (C16)</b>       | -21.9                                            | 1.0                            |
| <b>Octadecanol (C18)</b>       | -22.4                                            | 2.6                            |
| <b>Nonanoic Acid (C9)</b>      | -37.3                                            | 0.6                            |
| <b>Dodecanoic Acid (C10)</b>   | -33.5                                            | 0.5                            |
| <b>Hexadecanoic Acid (C16)</b> | -32.8                                            | 1.2                            |
| <b>Octadecanoic Acid (C18)</b> | -35.1                                            | 0.9                            |

## REFERENCES

- 1 M. Shiraiwa, Y. Li, A. P. Tsimpidi, V. A. Karydis, T. Berkemeier, S. N. Pandis, J. Lelieveld, T. Koop and U. Po, Global distribution of particle phase state in atmospheric secondary organic aerosols, *Nat. Commun.*, 2017, **8**, 1–7.
